# Supplementary material for: GBP4 is an Accurate Diagnostic Biomarker and a Potential Treatment Target for Crohn’s Disease
Source: Research Square preprint supplement (doi:10.21203/rs.3.rs-1144474/v1), 2021-12-10
Supplement: Supplementary file 2 [file 7388cd471be0a3597b33fb9d.docx]

**Additional file 2 GO analysis of modules in the WGCNA**

| Cluster | ID | Description | GeneRatio | qvalue |
| --- | --- | --- | --- | --- |
| brown | GO:0006901 | vesicle coating | 4/41 | 0.00698955 |
| brown | GO:0048199 | vesicle targeting, to, from or within Golgi | 4/41 | 0.00698955 |
| brown | GO:0048194 | Golgi vesicle budding | 4/41 | 0.00698955 |
| brown | GO:0046889 | positive regulation of lipid biosynthetic process | 4/41 | 0.0072672 |
| brown | GO:0034379 | very-low-density lipoprotein particle assembly | 2/41 | 0.02183167 |
| brown | GO:0097193 | intrinsic apoptotic signaling pathway | 5/41 | 0.02183167 |
| brown | GO:0150011 | regulation of neuron projection arborization | 2/41 | 0.02183167 |
| grey | GO:0002483 | antigen processing and presentation of endogenous peptide | 8/485 | 6.7644E-06 |
| grey | GO:0019885 | antigen processing and presentation of endogenous peptide | 8/485 | 6.7644E-06 |
| grey | GO:0002460 | adaptive immune response | 28/485 | 0.00036465 |
| grey | GO:0000302 | response to reactive oxygen species | 21/485 | 0.00060312 |
| grey | GO:0071346 | cellular response to interferon-gamma | 18/485 | 0.00060422 |
| grey | GO:0034341 | response to interferon-gamma | 19/485 | 0.00060422 |
| grey | GO:0071496 | cellular response to external stimulus | 25/485 | 0.00060422 |
| grey | GO:0002697 | regulation of immune effector process | 31/485 | 0.00067616 |
| grey | GO:0046461 | neutral lipid catabolic process | 9/485 | 0.00069409 |
| grey | GO:0046464 | acylglycerol catabolic process | 9/485 | 0.00069409 |
| grey | GO:0042110 | T cell activation | 31/485 | 0.00069409 |
| grey | GO:0044242 | cellular lipid catabolic process | 20/485 | 0.00069409 |
| grey | GO:0045785 | positive regulation of cell adhesion | 28/485 | 0.00119159 |
| grey | GO:0006936 | muscle contraction | 24/485 | 0.00247921 |
| grey | GO:0072012 | glomerulus vasculature development | 6/485 | 0.00340586 |
| grey | GO:0002831 | regulation of response to biotic stimulus | 25/485 | 0.00431718 |
| grey | GO:0061180 | mammary gland epithelium development | 9/485 | 0.00511813 |
| grey | GO:0070372 | regulation of ERK1 and ERK2 cascade | 19/485 | 0.01531522 |
| grey | GO:0009060 | aerobic respiration | 9/485 | 0.01537995 |
| grey | GO:0030198 | extracellular matrix organization | 22/485 | 0.02193734 |
| grey | GO:0006801 | superoxide metabolic process | 8/485 | 0.02193734 |
| grey | GO:0042493 | response to drug | 22/485 | 0.02296567 |
| grey | GO:0050848 | regulation of calcium-mediated signaling | 9/485 | 0.03261646 |
| grey | GO:0031960 | response to corticosteroid | 12/485 | 0.03268095 |
| grey | GO:1902170 | cellular response to reactive nitrogen species | 4/485 | 0.03449802 |
| grey | GO:0006575 | cellular modified amino acid metabolic process | 13/485 | 0.03566657 |
| grey | GO:0010038 | response to metal ion | 20/485 | 0.03630918 |
| grey | GO:0035633 | maintenance of blood-brain barrier | 5/485 | 0.04183802 |
| grey | GO:0007193 | adenylate cyclase-inhibiting G protein-coupled receptor | 8/485 | 0.04183802 |
| turquoise | GO:0034341 | response to interferon-gamma | 36/234 | 5.5286E-28 |
| turquoise | GO:0001819 | positive regulation of cytokine production | 38/234 | 2.56E-18 |
| turquoise | GO:0002831 | regulation of response to biotic stimulus | 36/234 | 7.7623E-18 |
| turquoise | GO:0007159 | leukocyte cell-cell adhesion | 32/234 | 7.0926E-16 |
| turquoise | GO:0002697 | regulation of immune effector process | 35/234 | 2.6111E-15 |
| turquoise | GO:0042110 | T cell activation | 34/234 | 3.4345E-14 |
| turquoise | GO:0006909 | phagocytosis | 29/234 | 8.0316E-13 |
| turquoise | GO:0043312 | neutrophil degranulation | 29/234 | 1.4466E-10 |
| turquoise | GO:0051770 | positive regulation of nitric-oxide synthase biosynthetic | 8/234 | 2.9091E-10 |
| turquoise | GO:0050663 | cytokine secretion | 12/234 | 3.3621E-09 |
| turquoise | GO:0051092 | positive regulation of NF-kappaB transcription factor activity | 16/234 | 5.9091E-09 |
| turquoise | GO:0042590 | antigen processing and presentation of exogenous peptide | 12/234 | 1.1249E-08 |
| turquoise | GO:0006968 | cellular defense response | 10/234 | 3.8175E-08 |
| turquoise | GO:0072503 | cellular divalent inorganic cation homeostasis | 25/234 | 8.7239E-08 |
| turquoise | GO:2000106 | regulation of leukocyte apoptotic process | 11/234 | 2.537E-07 |
| turquoise | GO:0007596 | blood coagulation | 18/234 | 5.6339E-06 |
| turquoise | GO:0050817 | coagulation | 18/234 | 6.874E-06 |
| turquoise | GO:0046596 | regulation of viral entry into host cell | 6/234 | 8.0363E-05 |
| turquoise | GO:0046718 | viral entry into host cell | 10/234 | 8.0363E-05 |
| turquoise | GO:0070482 | response to oxygen levels | 17/234 | 0.00010976 |
| turquoise | GO:0001776 | leukocyte homeostasis | 8/234 | 0.00012511 |
| turquoise | GO:0051924 | regulation of calcium ion transport | 13/234 | 0.0001799 |
| turquoise | GO:0043551 | regulation of phosphatidylinositol 3-kinase activity | 6/234 | 0.00065399 |
| turquoise | GO:0046209 | nitric oxide metabolic process | 7/234 | 0.00067161 |
| turquoise | GO:1905330 | regulation of morphogenesis of an epithelium | 10/234 | 0.0007252 |
| turquoise | GO:2001057 | reactive nitrogen species metabolic process | 7/234 | 0.00080537 |
| turquoise | GO:0030198 | extracellular matrix organization | 15/234 | 0.00097359 |
| turquoise | GO:0062009 | secondary palate development | 4/234 | 0.00141842 |
| turquoise | GO:0007584 | response to nutrient | 9/234 | 0.00192322 |
| turquoise | GO:0033238 | regulation of cellular amine metabolic process | 6/234 | 0.00302842 |
| turquoise | GO:0008360 | regulation of cell shape | 8/234 | 0.00424595 |
| turquoise | GO:0031146 | SCF-dependent proteasomal ubiquitin-dependent protein | 6/234 | 0.00555191 |
| turquoise | GO:0045730 | respiratory burst | 4/234 | 0.00574841 |
| turquoise | GO:0033194 | response to hydroperoxide | 3/234 | 0.00675324 |
| turquoise | GO:0061448 | connective tissue development | 10/234 | 0.0080417 |
| turquoise | GO:0032418 | lysosome localization | 5/234 | 0.01086616 |
| turquoise | GO:0033622 | integrin activation | 3/234 | 0.01347299 |
| turquoise | GO:1905809 | negative regulation of synapse organization | 3/234 | 0.01494658 |
| turquoise | GO:0048545 | response to steroid hormone | 11/234 | 0.01680921 |
| turquoise | GO:0031529 | ruffle organization | 4/234 | 0.01996218 |
| turquoise | GO:0009435 | NAD biosynthetic process | 3/234 | 0.02092105 |
| turquoise | GO:0048304 | positive regulation of isotype switching to IgG isotypes | 2/234 | 0.02407893 |
| turquoise | GO:0060513 | prostatic bud formation | 2/234 | 0.02407893 |
| turquoise | GO:0007568 | aging | 10/234 | 0.02474809 |
| turquoise | GO:0016485 | protein processing | 8/234 | 0.02518769 |
| turquoise | GO:0010972 | negative regulation of G2/M transition of mitotic cell cycle | 5/234 | 0.0253769 |
| turquoise | GO:0051968 | positive regulation of synaptic transmission, glutamatergic | 3/234 | 0.02609045 |
| turquoise | GO:0044706 | multi-multicellular organism process | 8/234 | 0.0266932 |
| turquoise | GO:0001947 | heart looping | 4/234 | 0.02909345 |
| turquoise | GO:0045907 | positive regulation of vasoconstriction | 3/234 | 0.02986192 |
| turquoise | GO:0006691 | leukotriene metabolic process | 3/234 | 0.03131052 |
| turquoise | GO:0014831 | gastro-intestinal system smooth muscle contraction | 2/234 | 0.03131052 |
| turquoise | GO:0032957 | inositol trisphosphate metabolic process | 2/234 | 0.03131052 |
| turquoise | GO:0072537 | fibroblast activation | 2/234 | 0.03131052 |
| turquoise | GO:0002679 | respiratory burst involved in defense response | 2/234 | 0.03554947 |
| turquoise | GO:0035563 | positive regulation of chromatin binding | 2/234 | 0.03554947 |
| turquoise | GO:0046348 | amino sugar catabolic process | 2/234 | 0.03554947 |
