# Supplementary material for: GBP4 is an Accurate Diagnostic Biomarker and a Potential Treatment Target for Crohn’s Disease
Source: Research Square preprint supplement (doi:10.21203/rs.3.rs-1144474/v1), 2021-12-10
Supplement: Supplementary file 3 [file ef5de0c9ae6658fa12864eeb.docx]

**Additional file 3** **KEGG analysis of modules**

| Cluster | ID | Description | GeneRatio | qvalue |
| --- | --- | --- | --- | --- |
| grey | hsa04612 | Antigen processing and presentation | 13/263 | 0.00024293 |
| grey | hsa05330 | Allograft rejection | 9/263 | 0.00024293 |
| grey | hsa05416 | Viral myocarditis | 11/263 | 0.00024293 |
| grey | hsa05332 | Graft-versus-host disease | 9/263 | 0.00038122 |
| grey | hsa04940 | Type I diabetes mellitus | 9/263 | 0.00038122 |
| grey | hsa04514 | Cell adhesion molecules | 16/263 | 0.00104212 |
| grey | hsa05320 | Autoimmune thyroid disease | 9/263 | 0.0016105 |
| grey | hsa04668 | TNF signaling pathway | 12/263 | 0.00834655 |
| grey | hsa04145 | Phagosome | 13/263 | 0.03668068 |
| turquoise | hsa05150 | Staphylococcus aureus infection | 15/146 | 1.7888E-08 |
| turquoise | hsa05133 | Pertussis | 13/146 | 5.1061E-08 |
| turquoise | hsa04060 | Cytokine-cytokine receptor interaction | 23/146 | 1.0829E-07 |
| turquoise | hsa05140 | Leishmaniasis | 12/146 | 3.5923E-07 |
| turquoise | hsa04061 | Viral protein interaction with cytokine and cytokine receptor | 13/146 | 6.5677E-07 |
| turquoise | hsa05152 | Tuberculosis | 16/146 | 3.0275E-06 |
| turquoise | hsa04380 | Osteoclast differentiation | 13/146 | 9.068E-06 |
| turquoise | hsa05323 | Rheumatoid arthritis | 11/146 | 1.3744E-05 |
| turquoise | hsa04621 | NOD-like receptor signaling pathway | 15/146 | 1.5646E-05 |
| turquoise | hsa04062 | Chemokine signaling pathway | 15/146 | 2.4166E-05 |
| turquoise | hsa05321 | Inflammatory bowel disease | 9/146 | 2.7622E-05 |
| turquoise | hsa05144 | Malaria | 8/146 | 2.8833E-05 |
| turquoise | hsa04610 | Complement and coagulation cascades | 10/146 | 2.8833E-05 |
| turquoise | hsa05145 | Toxoplasmosis | 11/146 | 5.0453E-05 |
| turquoise | hsa04630 | JAK-STAT signaling pathway | 13/146 | 6.1318E-05 |
| turquoise | hsa05164 | Influenza A | 13/146 | 0.00010377 |
| turquoise | hsa04145 | Phagosome | 12/146 | 0.00014709 |
| turquoise | hsa04668 | TNF signaling pathway | 10/146 | 0.0002488 |
| turquoise | hsa05417 | Lipid and atherosclerosis | 13/146 | 0.00095857 |
| turquoise | hsa04659 | Th17 cell differentiation | 9/146 | 0.00096362 |
| turquoise | hsa05322 | Systemic lupus erythematosus | 10/146 | 0.00110863 |
| turquoise | hsa04658 | Th1 and Th2 cell differentiation | 8/146 | 0.00155102 |
| turquoise | hsa05171 | Coronavirus disease - COVID-19 | 13/146 | 0.00163702 |
| turquoise | hsa05169 | Epstein-Barr virus infection | 12/146 | 0.00163702 |
| turquoise | hsa04933 | AGE-RAGE signaling pathway in diabetic complications | 8/146 | 0.00241769 |
| turquoise | hsa05146 | Amoebiasis | 8/146 | 0.00265795 |
| turquoise | hsa05134 | Legionellosis | 6/146 | 0.00279114 |
| turquoise | hsa04620 | Toll-like receptor signaling pathway | 8/146 | 0.00281263 |
| turquoise | hsa04613 | Neutrophil extracellular trap formation | 11/146 | 0.00303884 |
| turquoise | hsa05235 | PD-L1 expression and PD-1 checkpoint pathway in cancer | 7/146 | 0.00512318 |
| turquoise | hsa03050 | Proteasome | 5/146 | 0.00620011 |
| turquoise | hsa04514 | Cell adhesion molecules | 9/146 | 0.00642128 |
| turquoise | hsa04657 | IL-17 signaling pathway | 7/146 | 0.00642128 |
| turquoise | hsa04917 | Prolactin signaling pathway | 6/146 | 0.00661273 |
| turquoise | hsa04672 | Intestinal immune network for IgA production | 5/146 | 0.00731625 |
| turquoise | hsa05310 | Asthma | 4/146 | 0.00867661 |
| turquoise | hsa04650 | Natural killer cell mediated cytotoxicity | 8/146 | 0.00951371 |
| turquoise | hsa04064 | NF-kappa B signaling pathway | 7/146 | 0.00997073 |
| turquoise | hsa04612 | Antigen processing and presentation | 6/146 | 0.01004124 |
| turquoise | hsa04662 | B cell receptor signaling pathway | 6/146 | 0.0123887 |
| turquoise | hsa05162 | Measles | 8/146 | 0.0123887 |
| turquoise | hsa05416 | Viral myocarditis | 5/146 | 0.01490962 |
| turquoise | hsa05330 | Allograft rejection | 4/146 | 0.01546052 |
| turquoise | hsa05166 | Human T-cell leukemia virus 1 infection | 10/146 | 0.02184656 |
| turquoise | hsa05202 | Transcriptional misregulation in cancer | 9/146 | 0.02461673 |
| turquoise | hsa04217 | Necroptosis | 8/146 | 0.02461673 |
| turquoise | hsa05167 | Kaposi sarcoma-associated herpesvirus | 9/146 | 0.02525212 |
| turquoise | hsa04625 | C-type lectin receptor signaling pathway | 6/146 | 0.03296211 |
